# Supplementary material
Source: PubMed Central journal article supplement (PMC7575875)
Supplement: mmc1.pdf [file mmc1.pdf]

iScience, Volume 23

## **Supplemental Information**

### **Furin: A Potential Therapeutic**

#### **Target for COVID-19**

**Canrong Wu, Mengzhu Zheng, Yueying Yang, Xiaoxia Gu, Kaiyin Yang, Mingxue Li, Yang Liu, Qingzhe Zhang, Peng Zhang, Yali Wang, Qiqi Wang, Yang Xu, Yirong Zhou, Yonghui Zhang, Lixia Chen, and Hua Li**

# Supplementary information

## Furin, a potential therapeutic target for COVID-19

Canrong Wu,<sup>a,1</sup> Mengzhu Zheng,<sup>a,1</sup> Yueying Yang,<sup>b,1</sup> Xiaoxia Gu,<sup>a</sup> Kaiyin Yang,<sup>a</sup> Mingxue Li,<sup>b</sup> Yang Liu,<sup>b</sup> Qingzhe Zhang,<sup>a</sup> Peng Zhang,<sup>b</sup> Yali Wang,<sup>b</sup> Qiqi Wang,<sup>b</sup> Yang Xu,<sup>b</sup> Yirong Zhou,<sup>a,\*</sup> Yonghui Zhang,<sup>a,\*</sup> Lixia Chen,<sup>b,\*</sup> Hua Li<sup>a,b,\*,2</sup>

<sup>a</sup>*Hubei Key Laboratory of Natural Medicinal Chemistry and Resource Evaluation, School of Pharmacy, Tongji-Rongcheng Center for Biomedicine, Tongji Medical College, Huazhong University of Science and Technology, Wuhan 430030, China*

<sup>b</sup>*Wuya College of Innovation, Key Laboratory of Structure-Based Drug Design & Discovery, Ministry of Education, Shenyang Pharmaceutical University, Shenyang 110016, China*

<sup>1</sup>These authors contributed equally to this work.

<sup>2</sup>Lead Contact.

\*Corresponding author: Hua Li, Lixia Chen, Yonghui Zhang & Yirong Zhou

E-mail: li\_hua@hust.edu.cn (H. Li)

syzyclx@163.com (L. Chen)

zhangyh@mails.tjmu.edu.cn (Y. Zhang)

zhouyirong@hust.edu.cn (Y. Zhou),

## **Transparent Methods**

### **Homology Spike protein blast and sequence alignment.**

The Spike protein of (GB: QHR63250.1) was downloaded from NCBI nucleotide database. The protein sequence were aligned with whole database using BLASTp to search for homology viral Spike protein (Algorithm parameters, Max target sequences: 1000, Expect threshold: 10). Multiple-sequence alignment was conducted in BLASTp online and analysis with DNAMAN and Jalview. The evolutionary history was inferred using the Neighbor-Joining method in MEGA 7 software package. The percentage of replicate trees in which the associated taxa clustered together in the bootstrap test was determined by 500 replicates. The Spike protein sequence analyses were conducted in snapgene view.

### **Furin cleavage site prediction**

The prediction of furin cleavage sites were carried out in ProP 1.0 Server (<http://www.cbs.dtu.dk/services/ProP/> ).

### **Compounds database**

Approved drug database was from the subset of ZINC database, ZDD (ZINC drug database) containing 2924 compounds ([Irwin et al., 2012](#)). Natural products database was constructed by ourselves, containing 1066 chemicals separated from traditional Chinese herbals in own lab and natural-occurring potential antiviral components and derivatives. Antiviral compounds library contains 78 known antiviral drugs and reported antiviral compounds through literature search.

### **Homology modeling and molecular docking**

Corresponding homology models predicted by Fold and Function Assignment System server for each target protein were downloaded from Protein Data Bank ([www.rcsb.org](http://www.rcsb.org)). Alignment of two protein sequences and subsequent homology modeling were performed by bioinformatics module of ICM 3.7.3 modeling software on an Intel i7 4960 processor (MolSoft LLC, San Diego, CA). For the structure-based virtual screening, ligands were continuously resiliently made to dock with the target that was represented in potential energy maps by ICM 3.7.3 software, to identify possible drug candidates. 3D

compounds of each database were scored according to the internal coordinate mechanics (Internal Coordinate Mechanics, ICM) ([Abagyan et al., 1994](#)). Based on Monte Carlo method, stochastic global optimization procedure and pseudo-Brownian positional/torsional steps, the position of intrinsic molecular was optimized. By visually inspecting, compounds outside the active site, as well as those weakly fitting to the active site were eliminated. The software adopted two kind of scoring system. One is ICM score, which is based on the empirical function of predicted physical interaction, calculated according to seven parameters, including ligand-target hydrogen bonding interactions, internal force-field energy of the ligand, desolvation energy of hydrogen bond donor-acceptor, entropy loss due to conformational differences upon ligand binding, polar and non-polar solvation energy changes upon ligand binding, electrostatic energy and hydrophobic free energy (Neves et al., 2012). Another is mfscore, it is a potential of mean force score and provides an independent score of the strength of ligand-receptor interaction. It is a measure of statistical probability of interaction between the ligand and the receptor. It examines interatomic distances of the docked interaction, and compares that to existing interactions available in PDB (Muegge et al., 1999).

Compounds with Scores less than -30 or mfScores less than -100 (generally represents strong interactions) have priority to be selected. Protein-protein docking procedure was performed according to the ICM-Pro manual.

### **Expression and purification of furin**

The detailed procedures for expression and purification of human furin (UNIPROT ID P09958) refer to previous work with some modifications ([Dahms et al., 2018](#)). Briefly, the sequence encoding human furin amino acids 23-574 was cloned into PEGMan vector with N-terminal secretion signal peptide and C-terminal His tag. The expressed plasmid was transfected in HEK293-GnTI cells using polyethylenimine transfection reagent, and the transfected cells were cultured in a 10 cm plate with 10 mL of DMEM (Invitrogen) containing 10% bovine calf serum (HyClone, GE Healthcare) overnight. The medium was changed to 10 mL of freeStyle 293 Expression Media (Thermo Fisher Scientific), and the

cells were cultured for another 72 h. The conditioned medium was collected and centrifuged at 4500 g for 20 min. The supernate protein was dialysis against 25 mM Tris, pH 8.0, 250 mM NaCl, 5 mM CaCl<sub>2</sub> overnight at 20 °C before purification. The secreted furin was purified from the culture media using Ni-NTA agarose (Qiagen) affinity chromatography with gravity flow.

### **Enzymatic activity and inhibition assays**

In brief, the activity of human furin was measured by a continuous kinetic assay, with the substrate Boc-Arg-Arg-Ala-Arg-AMC (GL Biochem) or Boc-Arg-Val-Arg-Arg-AMC (GL Biochem), using wavelengths of 360±40 nm and 460±40 nm for excitation and emission, respectively. Furin was added in assay buffer containing 100 mM HEPES buffer, pH 7.0, 0.2% (v/v) Triton X-100, 2 mM CaCl<sub>2</sub> and 0.1 mg/mL BSA. The assay started by immediately mixing with different concentrations of substrate (0.39-200 µM). The fluorophore, 7-amino-4-methylcoumarin (AMC) group released from Boc-RRAR-AMC or Boc-RVRR-AMC was monitored in the form of relative fluorescence units as a function of time (RFU/min) using a BioTEK Synergy H1 multimode microplate reader at 37 °C. The IC<sub>50</sub> values were calculated by fitted regression equation using the-log plot (GraphPad Prism). Each value was expressed with the means ± SD of three independent tests, each with three replicates.

### **Supplemental References**

Abagyan, R., Totrov, M., Kuznetsov, D. (1994). ICM-a new method for protein modeling and design-applications to docking and structure prediction from the distorted native conformation. *J Comput Chem* 15, 488-506.

Dahms, S.O., Harges, K., Steinmetzer, T., Than, M.E. (2018). X-ray Structures of the proprotein convertase furin bound with substrate analogue inhibitors reveal substrate specificity determinants beyond the S4 pocket. *Biochemistry* 57, 925-934.

Irwin, J.J., Sterling, T., Mysinger, M.M., Bolstad, E.S., Coleman, R.G. (2012). ZINC: a free tool to discover chemistry for biology. *J Chem Inf Model* 52, 1757-1768.

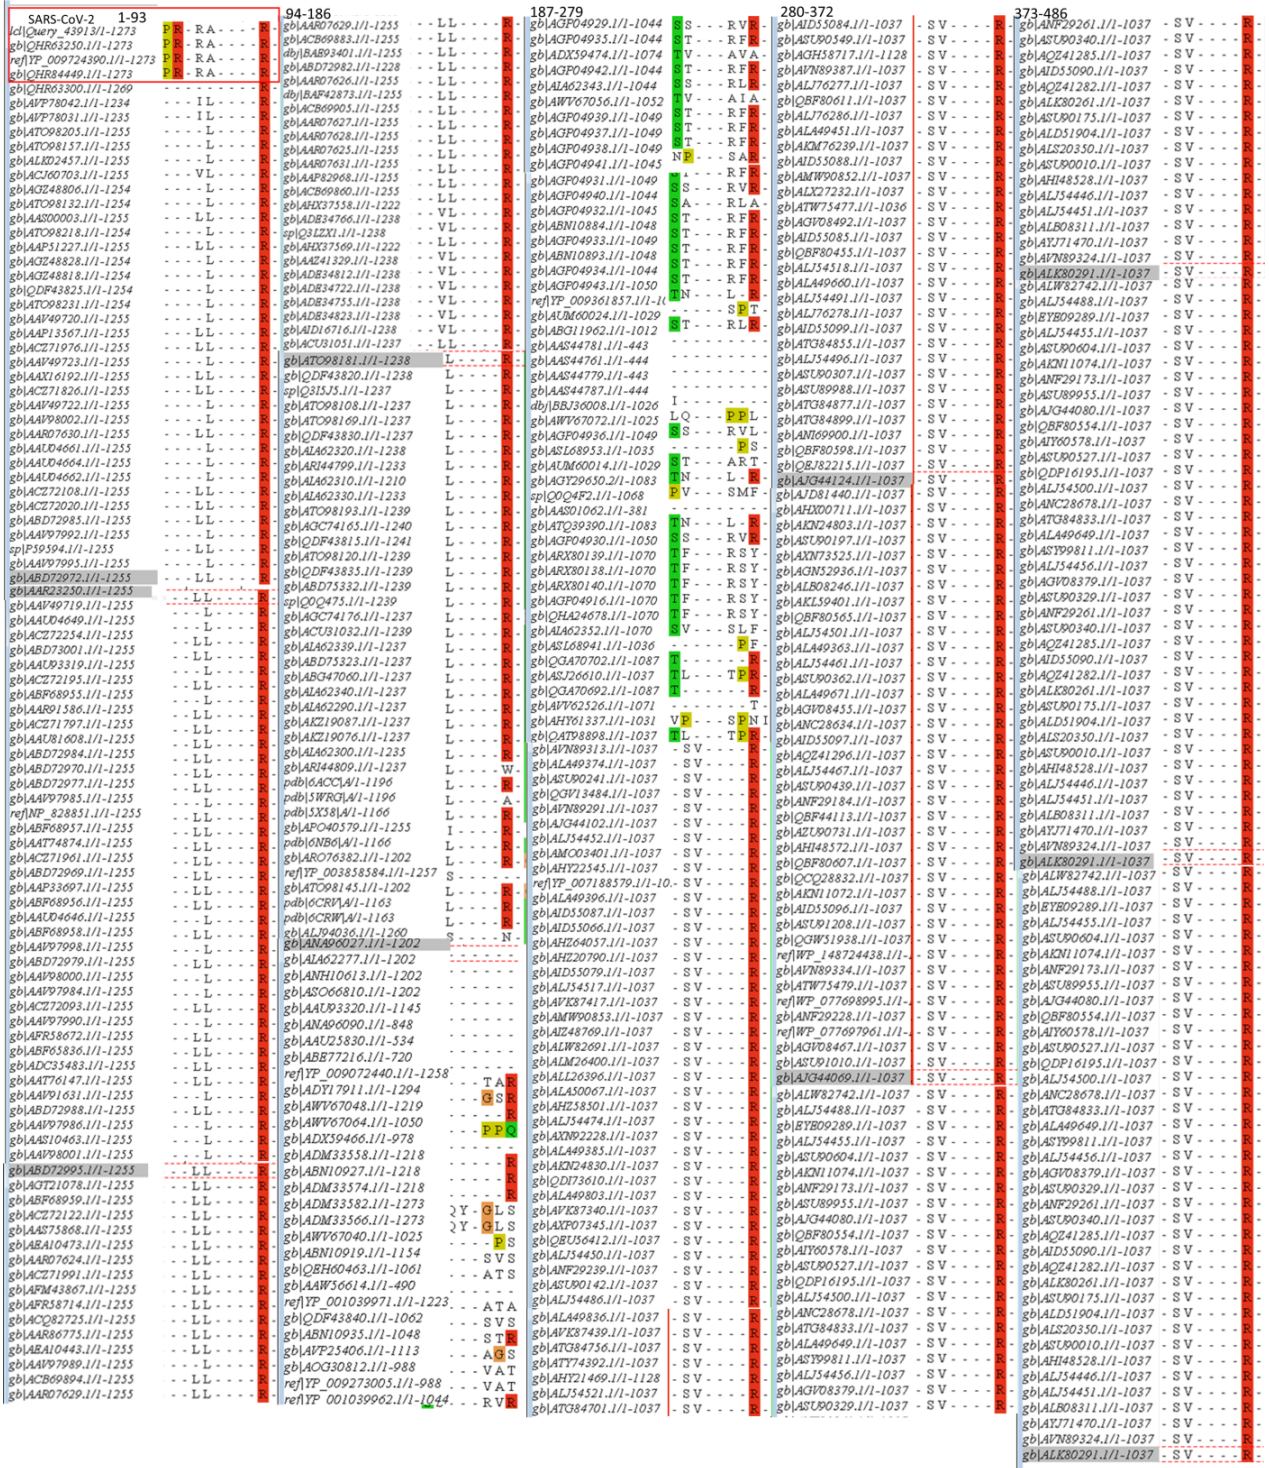

Figure S1. Multiple sequence alignment of 1000 protein sequences(1-486). Related to Figure 1.

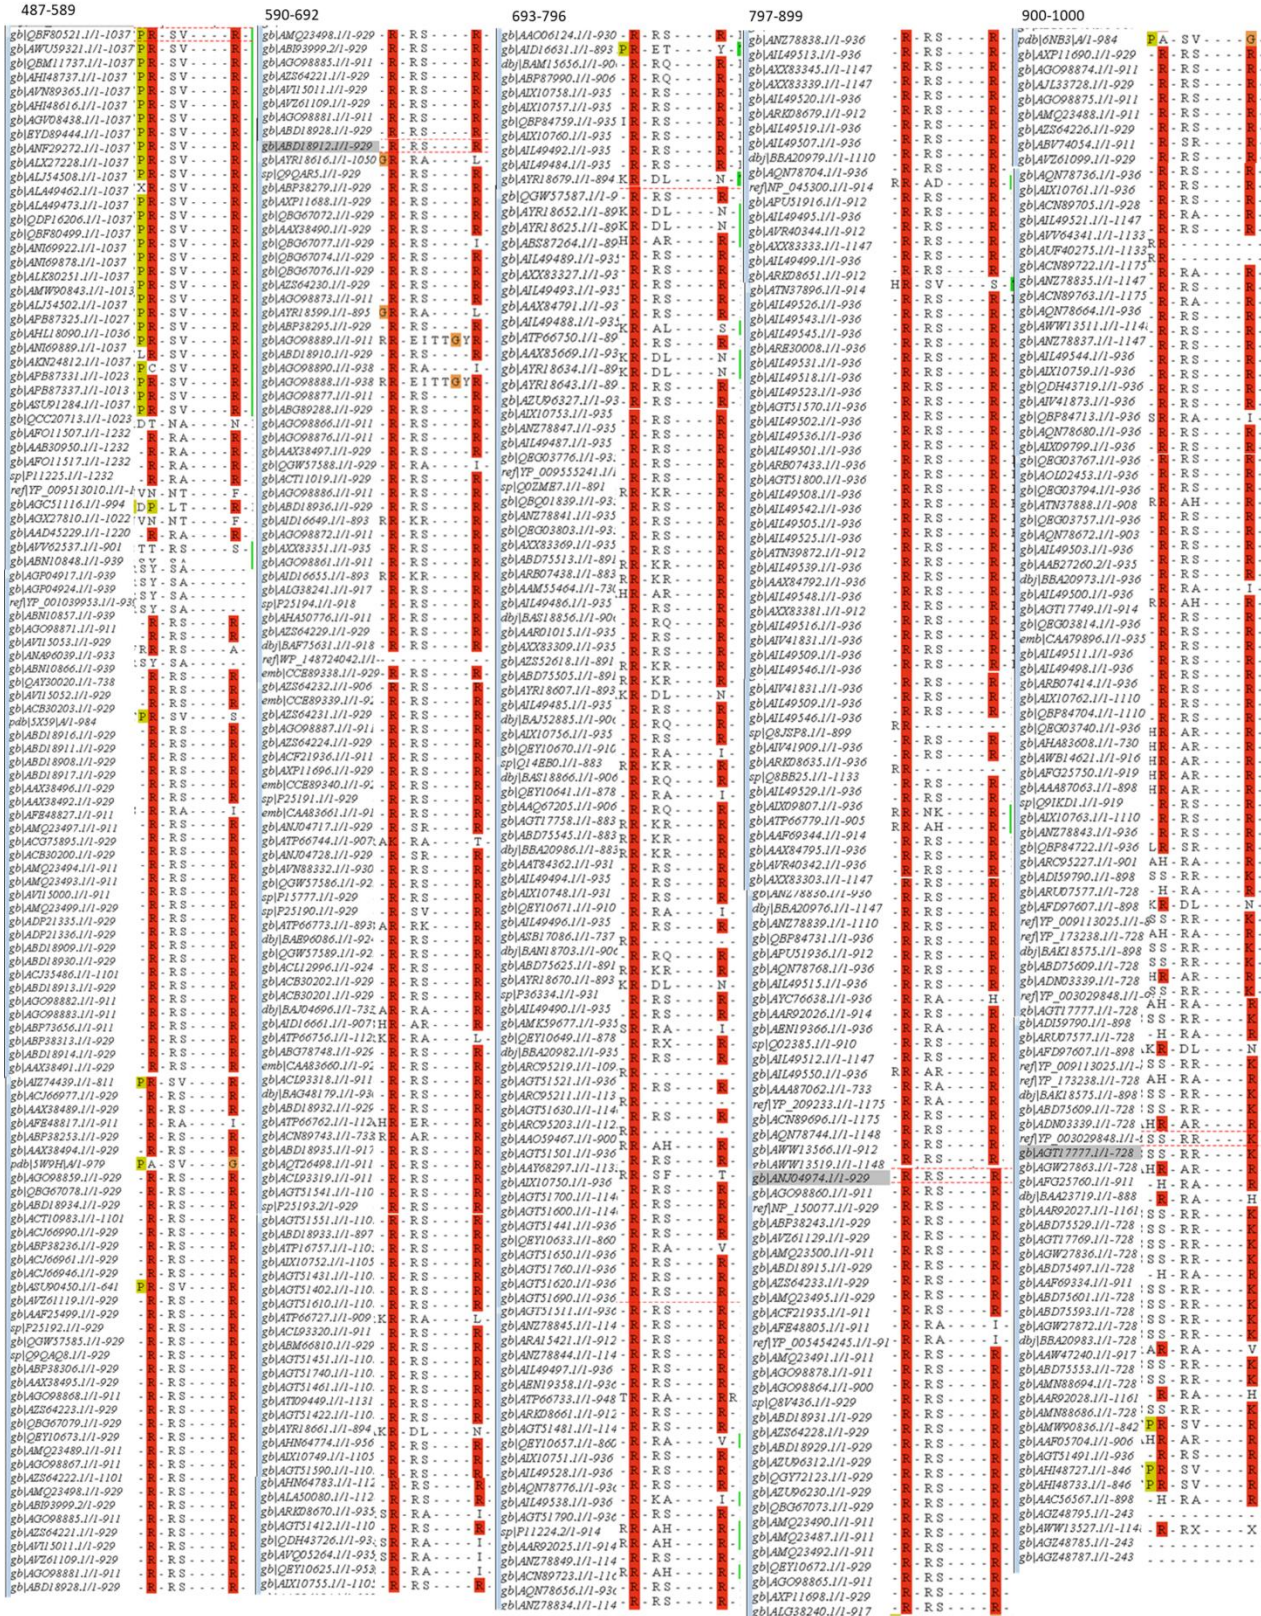

|          |     |         |    |       |        |
|----------|-----|---------|----|-------|--------|
| Sequence | 457 | YLRLFR  | KS | 0.179 | .      |
| Sequence | 458 | LYRLFR  | SN | 0.100 | .      |
| Sequence | 462 | FRKSNL  | PF | 0.069 | .      |
| Sequence | 466 | NLKPFR  | DI | 0.154 | .      |
| Sequence | 509 | NGQFTR  | IV | 0.091 | .      |
| Sequence | 528 | ATVCGPK | KS | 0.059 | .      |
| Sequence | 529 | TVCGPK  | ST | 0.146 | .      |
| Sequence | 535 | KSNLVK  | NK | 0.066 | .      |
| Sequence | 537 | TNLVKN  | CV | 0.093 | .      |
| Sequence | 557 | VLIESN  | KF | 0.057 | .      |
| Sequence | 558 | LIESNK  | FL | 0.091 | .      |
| Sequence | 567 | PFQQGR  | DI | 0.127 | .      |
| Sequence | 577 | DTDAVR  | DP | 0.076 | .      |
| Sequence | 634 | QLTPTW  | YV | 0.098 | .      |
| Sequence | 646 | SNFQTR  | AG | 0.103 | .      |
| Sequence | 652 | TQNSFR  | RA | 0.111 | .      |
| Sequence | 683 | QNSPFR  | AR | 0.146 | .      |
| Sequence | 685 | NSPRRR  | SV | 0.620 | *ProP* |
| Sequence | 733 | LPVSMK  | TS | 0.065 | .      |
| Sequence | 765 | FCTQLN  | AL | 0.076 | .      |
| Sequence | 776 | IAVEQR  | NT | 0.071 | .      |
| Sequence | 786 | EYFAQK  | GI | 0.066 | .      |
| Sequence | 790 | QVQIYK  | TP | 0.056 | .      |
| Sequence | 795 | YKTPPI  | DF | 0.079 | .      |
| Sequence | 811 | ILDPSP  | PS | 0.058 | .      |
| Sequence | 814 | DPSKPK  | RS | 0.071 | .      |
| Sequence | 815 | PSKPSR  | SF | 0.333 | .      |
| Sequence | 825 | EMLFVK  | VT | 0.053 | .      |
| Sequence | 835 | ADGFIK  | QY | 0.094 | .      |
| Sequence | 847 | LGDIAAR | DL | 0.105 | .      |
| Sequence | 854 | DLCAQK  | FN | 0.064 | .      |
| Sequence | 905 | AMOMAY  | FN | 0.169 | .      |
| Sequence | 921 | VLYENK  | LI | 0.065 | .      |
| Sequence | 933 | FNSAIK  | LQ | 0.067 | .      |
| Sequence | 947 | TASALG  | LQ | 0.077 | .      |
| Sequence | 964 | ALNVLK  | QL | 0.079 | .      |
| Sequence | 983 | LNDLSR  | LD | 0.068 | .      |
| Sequence | 986 | ILSRDK  | VE | 0.129 | .      |
| Sequence | 995 | AEQIDR  | LI | 0.081 | .      |

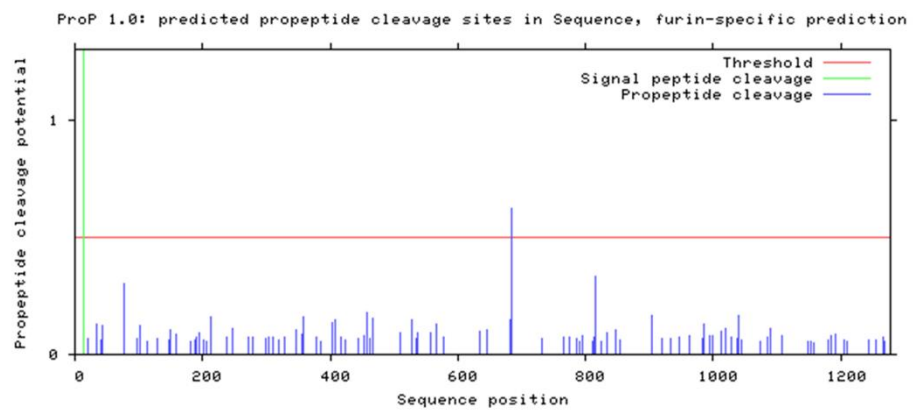

Figure S3. Result of furin cleavage site prediction of Spike protein in SARS-CoV-2, which predicted by online method ProP 1.0 Server. Related to Table 1.

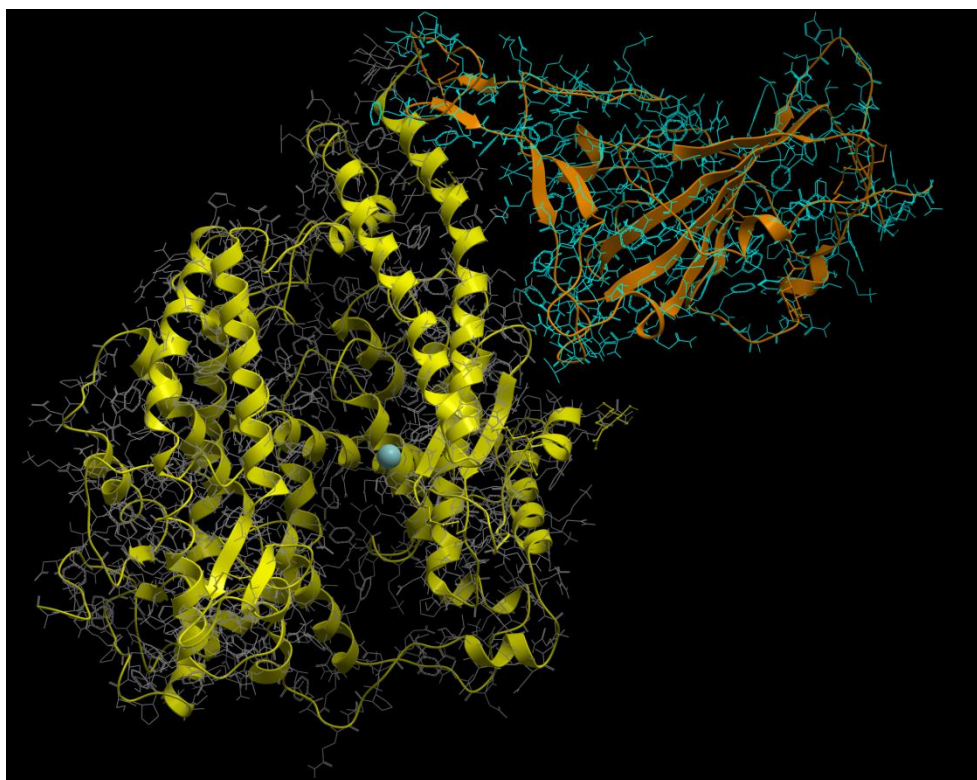

Fig S4 Protein-protein docking calculation model of SARS-CoV-2 spike RBD (light blue) with human ACE2 (yellow), original RBD conformation was shown in orange. The calculated free energy is -50.13 Kcal/mol. Related to Figure 3.



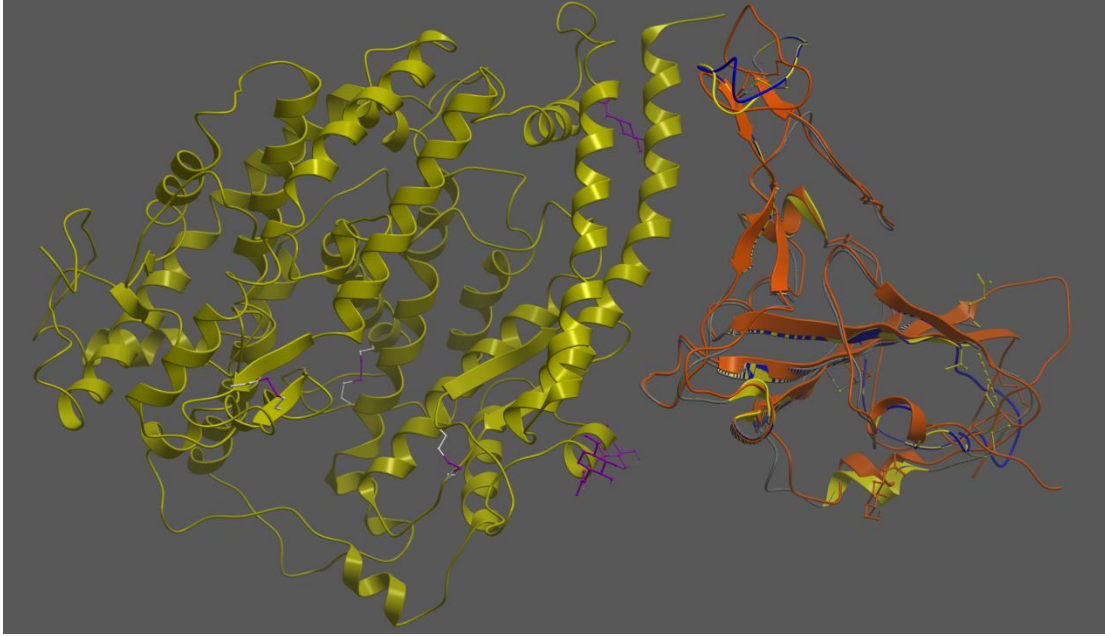

Fig S5 Comparison of SARS-CoV-2 spike RBD (orange) and SARS spike RBD (yellow). The complex with ACE2 (left part, yellow) was shown. The homology model of SARS-CoV-2 spike RBD built from SARS spike RBD was shown as blue. Related to Figure 3.

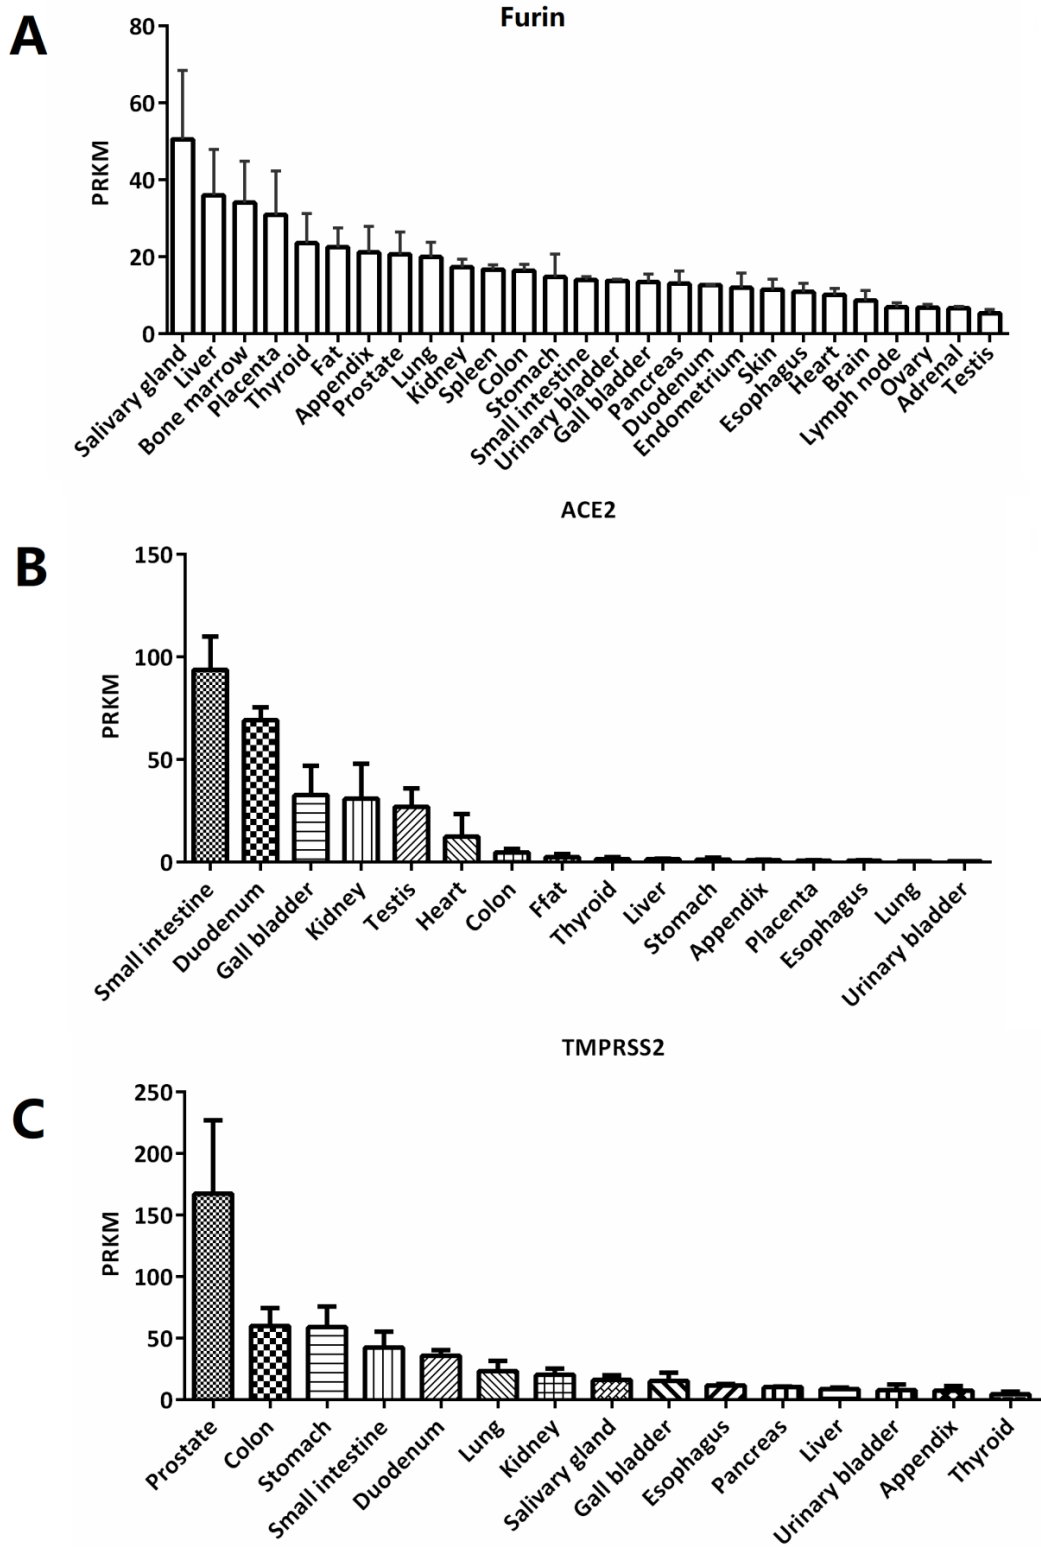

Figure S6. Expression levels of Furin, ACE2 and TMPRSS2 in various tissues. The data is from pubmed. Related to Figure 2B.

Table S1 Potential furin inhibitors from ZINC drug database, related to Figure 4

| No. | Drug Name             | Structure                                                                            | Pharmacological functions                                                    |
|-----|-----------------------|--------------------------------------------------------------------------------------|------------------------------------------------------------------------------|
| 1   | Aminopterin           | 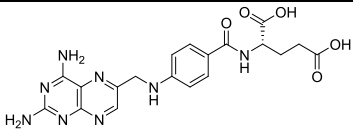   | Anti-tumor                                                                   |
| 2   | Folic acid            |    | Vitamin B9, necessary material for the growth and reproduction of body cells |
| 3   | Sulfoxone             |     | Antibacterial effect                                                         |
| 4   | Silybin               |    | Hepatoprotective effect                                                      |
| 5   | Diminazene            |   | Insecticidal effect                                                          |
| 6   | Fludarabine phosphate |   | Anti-tumor                                                                   |
| 7   | L-Arginine            |   | Nutritional supplement                                                       |
| 8   | Hydroxystilbamidine   |   | Antifungal effect                                                            |
| 9   | Methotrexate          |  | Antineoplastic, antirheumatic effects                                        |

|    |                       |                                                                                      |                                                          |
|----|-----------------------|--------------------------------------------------------------------------------------|----------------------------------------------------------|
| 10 | L-dopa                | 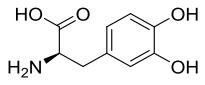    | Treatment of Parkinson's disease                         |
| 11 | Irinotecan            |    | Anti-tumor                                               |
| 12 | Cefoperazone          |     | Antibacterial effect                                     |
| 13 | Folinic acid          |    | Folic acid supplement                                    |
| 14 | Glycerol 3-phosphate  |     | Intermediate for serine synthesis                        |
| 15 | Valganciclovir        |    | Antivirus                                                |
| 16 | Fosaprepitant         |   | Treatment of nausea and vomiting induced by chemotherapy |
| 17 | Lomefloxacin          |   | Antibacterial effect                                     |
| 18 | Glutathione           |   | Hepatoprotective effect                                  |
| 19 | Famotidine            |   | Treatment of gastrohelcosis                              |
| 20 | Imatinib              |  | Anti-tumor                                               |
| 21 | Chenodeoxycholic acid |   | Dissolving gallstones                                    |

Table S2 Potential furin inhibitors from in-house natural product database, related to Figure 5

| No. | Drug Name                                                                                                                                                                                                                                    | Structure                                                                           | Pharmacological functions                          | Source                         |
|-----|----------------------------------------------------------------------------------------------------------------------------------------------------------------------------------------------------------------------------------------------|-------------------------------------------------------------------------------------|----------------------------------------------------|--------------------------------|
| 1   | (-)-Epigallocatechin gallate                                                                                                                                                                                                                 | 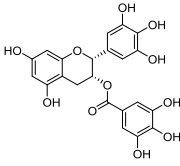   | Antioxidation, anti-tumor, treatment of depression | <i>Camellia sinensis</i>       |
| 2   | Theaflavin 3,3'-di-O-gallate                                                                                                                                                                                                                 |    | Antioxidant effect, anti-tumor, anti-virus         | <i>Camellia sinensis</i>       |
| 3   | Biorobin                                                                                                                                                                                                                                     |    | Anti-virus                                         | <i>Ficus benjamina</i>         |
| 4   | 14-deoxy-11,12-didehydroandrographiside                                                                                                                                                                                                      |   | Anti-virus, anti-inflammatory effect               | <i>Andrographis paniculata</i> |
| 5   | (1 <i>S</i> ,2 <i>R</i> ,4 <i>aS</i> ,5 <i>R</i> ,8 <i>aS</i> )-1-formamido-1,4 <i>a</i> -dimethyl-6-methylene-5-(( <i>E</i> )-2-(2-oxo-2,5-dihydrofuran-3-yl)ethenyl)decahydronaphthalen-2-yl 5-(( <i>R</i> )-1,2-dithiolan-3-yl)pentanoate |  | Anti-virus, anti-inflammatory effect               | Andrographolide derivatives    |
| 6   | 2 <i>β</i> ,3 <i>0β</i> -dihydroxy-3,4-seco-friedelolactone-27-lactone                                                                                                                                                                       |  | Anti-virus                                         | <i>Viola diffusa</i>           |

|    |                                                                                                                                                                                                               |                                                                                     |                                         |                                    |
|----|---------------------------------------------------------------------------------------------------------------------------------------------------------------------------------------------------------------|-------------------------------------------------------------------------------------|-----------------------------------------|------------------------------------|
| 7  | Phyllaemblicin G7                                                                                                                                                                                             | 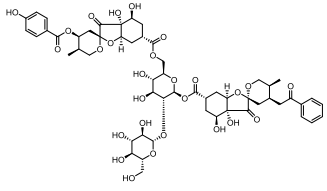   | Anti-virus                              | <i>Phyllanthus emblica</i>         |
| 8  | Andrographolide                                                                                                                                                                                               |    | Anti-virus,<br>anti-inflammatory effect | <i>Andrographis paniculata</i>     |
| 9  | 14-deoxy-11,12-didehydroandrographolide                                                                                                                                                                       |    | Anti-virus,<br>anti-inflammatory effect | <i>Andrographis paniculata</i>     |
| 10 | (1 <i>S</i> ,2 <i>R</i> ,4 <i>aS</i> ,5 <i>R</i> ,8 <i>aS</i> )-1-formamido-1,4 <i>a</i> -dimethyl-6-methylene-5-(( <i>E</i> )-2-(2-oxo-2,5-dihydrofuran-3-yl)ethenyl)decahydronaphthalen-2-yl 2-aminoacetate |   | Anti-virus,<br>anti-inflammatory effect | Andrographolide derivatives        |
| 11 | 2-[[2- <i>O</i> -(6-deoxy- $\alpha$ -L-mannopyranosyl)- $\beta$ -D-xylopyranosyl]oxy]-1,8-dihydroxy-6-ethoxy-9 <i>H</i> -xanthen-9-one                                                                        |  | Anti-virus,<br>anti-inflammatory effect | <i>Swertia kouitchensis</i>        |
| 12 | Kouitchenside J                                                                                                                                                                                               |  | Anti-virus,<br>anti-inflammatory effect | <i>Swertia kouitchensis</i>        |
| 13 | Stigmast-5-en-3-ol                                                                                                                                                                                            |  | Antioxidant effect                      | <i>Spatholobus suberectus dunn</i> |
| 14 | Kouitchenside F                                                                                                                                                                                               |  | Anti-virus,<br>anti-inflammatory effect | <i>Swertia kouitchensis</i>        |

Table S3

Potential furin inhibitors from the common antiviral drugs database, related to Figure 6

| No. | Drug Name                    | Structure                                                                            | Pharmacological functions                                       |
|-----|------------------------------|--------------------------------------------------------------------------------------|-----------------------------------------------------------------|
| 1   | Suramin                      | 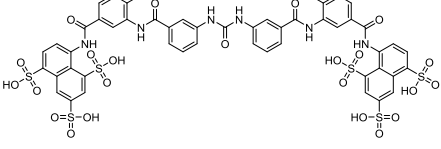   | DNA topoisomerase II inhibitor                                  |
| 2   | Indinavir                    |    | Human immunodeficiency virus Protease (HIV PR), anti-malaria    |
| 3   | Boceprevir                   |   | Hepatitis C virus Serine protease NS3/4A (HCV NS3/4A) Modulator |
| 4   | Tenofovir alafenamide        |   | HIV-1, HBV nucleotide reverse transcriptase inhibitor           |
| 5   | Tenofovir disoproxil         |  | HIV, HBV nucleotide reverse transcriptase inhibitor             |
| 6   | Acycloguanosine triphosphate |  | Thymidine kinase of herpesvirus                                 |

|    |                        |                                                                                      |                                                                                                        |
|----|------------------------|--------------------------------------------------------------------------------------|--------------------------------------------------------------------------------------------------------|
| 7  | Telaprevir             | 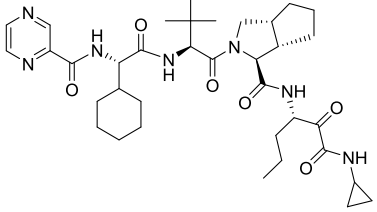   | Hepatitis C virus<br>Serine protease<br>NS3/4A (HCV<br>NS3/4A) Modulator                               |
| 8  | Dolutegravir           |    | Human<br>immunodeficiency<br>virus Integrase (HIV<br>IN)                                               |
| 9  | Maraviroc              |     | 1.C-C chemokine<br>receptor type 5<br>(CCR5)<br>2.CCR5 messenger<br>RNA(CCR5 mRNA)                     |
| 10 | Cobicistat             |   | Inhibitor of<br>cytochrome P450 3A<br>(CYP3A) enzymes                                                  |
| 11 | Stavudine triphosphate |  | Nucleoside analogue<br>reverse transcriptase<br>inhibitor used in the<br>treatment of HIV<br>infection |



Table S4. In vitro furin inhibitory effects of screening hits. Related to Figure 7.

| Compounds name               | In vitro furin protease inhibition percentage at 100 $\mu$ M(%) | IC50 ( $\mu$ M) |
|------------------------------|-----------------------------------------------------------------|-----------------|
| Aminopterin                  | 72                                                              | >30             |
| Folic acid                   | <30                                                             | >30             |
| Sulfoxone                    | <30                                                             | >30             |
| Silybin                      | 74                                                              | >30             |
| Diminazene                   | 95                                                              | 5.42 $\pm$ 0.11 |
| Fludarabine phosphate        | <30                                                             | >30             |
| L-Arginine                   | <30                                                             | >30             |
| Hydroxystilbamidine          | <30                                                             | >30             |
| Methotrexate                 | 73                                                              | >30             |
| L-dopa                       | <30                                                             | >30             |
| Irinotecan                   | <30                                                             | >30             |
| Cefoperazone                 | <30                                                             | >30             |
| Folinic acid                 | 44                                                              | >30             |
| Glycerol 3-phosphate         | <30                                                             | >30             |
| Valganciclovir               | <30                                                             | >30             |
| Fosaprepitant                | <30                                                             | >30             |
| Lomefloxacin                 | 40                                                              | >30             |
| Glutathione                  | <30                                                             | >30             |
| Famotidine                   | <30                                                             | >30             |
| Imatinib                     | 58                                                              | >30             |
| Chenodeoxycholic acid        | <30                                                             | >30             |
| Suramin                      | <30                                                             | >30             |
| Indinavir                    | <30                                                             | >30             |
| Boceprevir                   | <30                                                             | >30             |
| Tenofovir alafenamide        | <30                                                             | >30             |
| Tenofovir disoproxil         | 38                                                              | >30             |
| Acycloguanosine triphosphate | <30                                                             | >30             |
| Telaprevir                   | <30                                                             | >30             |
| Dolutegravir                 | <30                                                             | >30             |
| Maraviroc                    | <30                                                             | >30             |
| Cobicistat                   | <30                                                             | >30             |
| Stavudine triphosphate       | <30                                                             | >30             |
| (-)-Epigallocatechin gallate | <30                                                             | >30             |

|                          |     |     |
|--------------------------|-----|-----|
| Theaflavin               | <30 | >30 |
| 3,3'-di-O-gallate        |     |     |
| Biorobin                 | <30 | >30 |
| 14-deoxy-11,12-          |     |     |
| didehydroandrographiside | <30 | >30 |
| Phyllaemblicin G7        | <30 | >30 |
| Andrographolide          | <30 | >30 |
| 14-deoxy-11,12-          |     |     |
| didehydroandro           | <30 | >30 |
| grapholide               |     |     |
| Kouitchenside J          | <30 | >30 |
| Stigmast-5-en-3-ol       | <30 | >30 |
| Kouitchenside F          | <30 | >30 |

---
